# Supplementary material for: In situ decomposition of bromine-substituted catechol to increase the activity of titanium dioxide catalyst for visible-light-induced aerobic conversion of toluene to benzaldehyde
Source: Royal Society of Chemistry journal article supplement (doi:10.1039/d2nj00571a), 2022-01-01
Supplement: d2nj00571a1.pdf [file d2nj00571a1.pdf]

New Journal of Chemistry

Supporting Information

**In situ decomposition of bromine-substituted catechol to increase the activity of titanium dioxide catalyst for visible-light-induced aerobic conversion of toluene to benzaldehyde**

Kana Aitsuki,<sup>1</sup> Daiki Fukushima,<sup>1</sup> Hiroki Nakahara,<sup>1</sup> Kazumune Yo,<sup>1</sup> Masahito Kodera,<sup>1</sup> Sayuri Okunaka,<sup>2</sup> Hiromasa Tokudome,<sup>3</sup> Takanori Koitaya<sup>4,5</sup> and Yutaka Hitomi<sup>\*,1,5</sup>

<sup>1</sup> Department of Molecular Chemistry and Biochemistry, Faculty of Science and Engineering, Doshisha University, 1-3 Tatara Miyakodani, Kyotanabe, Kyoto 610-0321, Japan

<sup>2</sup> Global Zero Emission Research Center (GZR), National Institute of Advanced Industrial Science and Technology (AIST), 16-1 Onogawa, Tsukuba, Ibaraki 305-8569, Japan

<sup>3</sup> Research Institute, TOTO Ltd., 2-8-1 Honson, Chigasaki, Kanagawa 253-8577, Japan

<sup>4</sup> Department of Materials Molecular Science, Institute for Molecular Science, 38 Myodaiji, Okazaki 444-8585, Japan

<sup>5</sup> PRESTO/JST, 4-1-8 Honcho, Kawaguchi, Saitama 332-0012, Japan

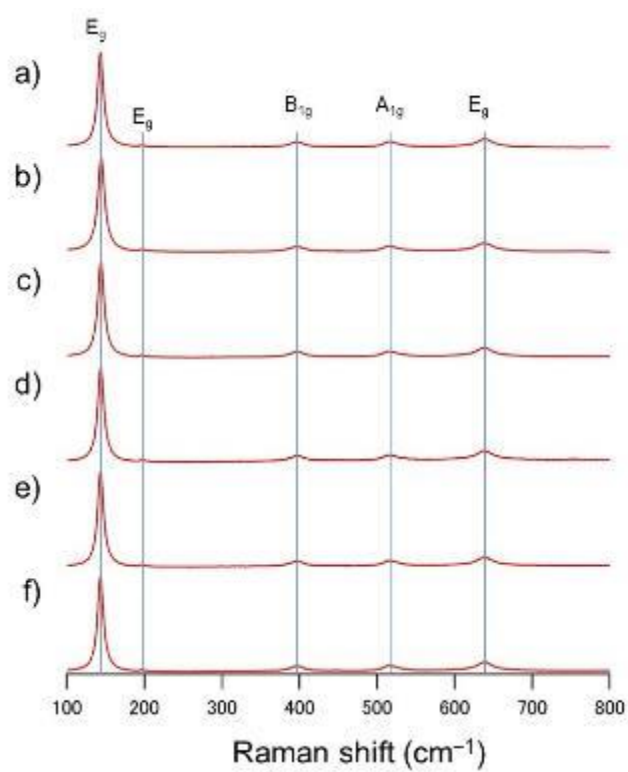

**Fig. S1.** Raman spectra of (a) bare  $\text{TiO}_2$ , (b)  $\text{Br}_4\text{Cat-TiO}_2\text{-TiO}_2$ , and the  $\text{TiO}_2$  powder obtained after (c) 1, (d) 3, (e) 7, and (f) 15 hours of the reaction using  $\text{Br}_4\text{Cat-TiO}_2$ .

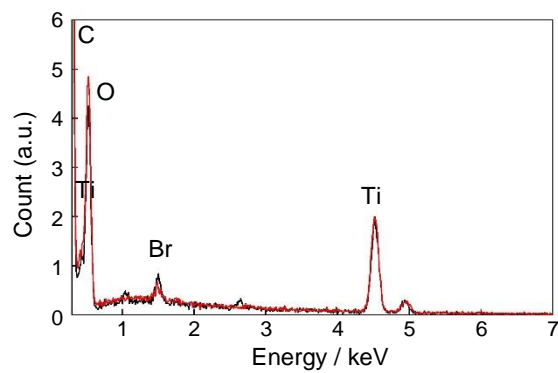

**Fig. S2.** EDS spectra of  $\text{Br}_4\text{Cat-TiO}_2$  (black line) and re- $\text{TiO}_2$  (red line).

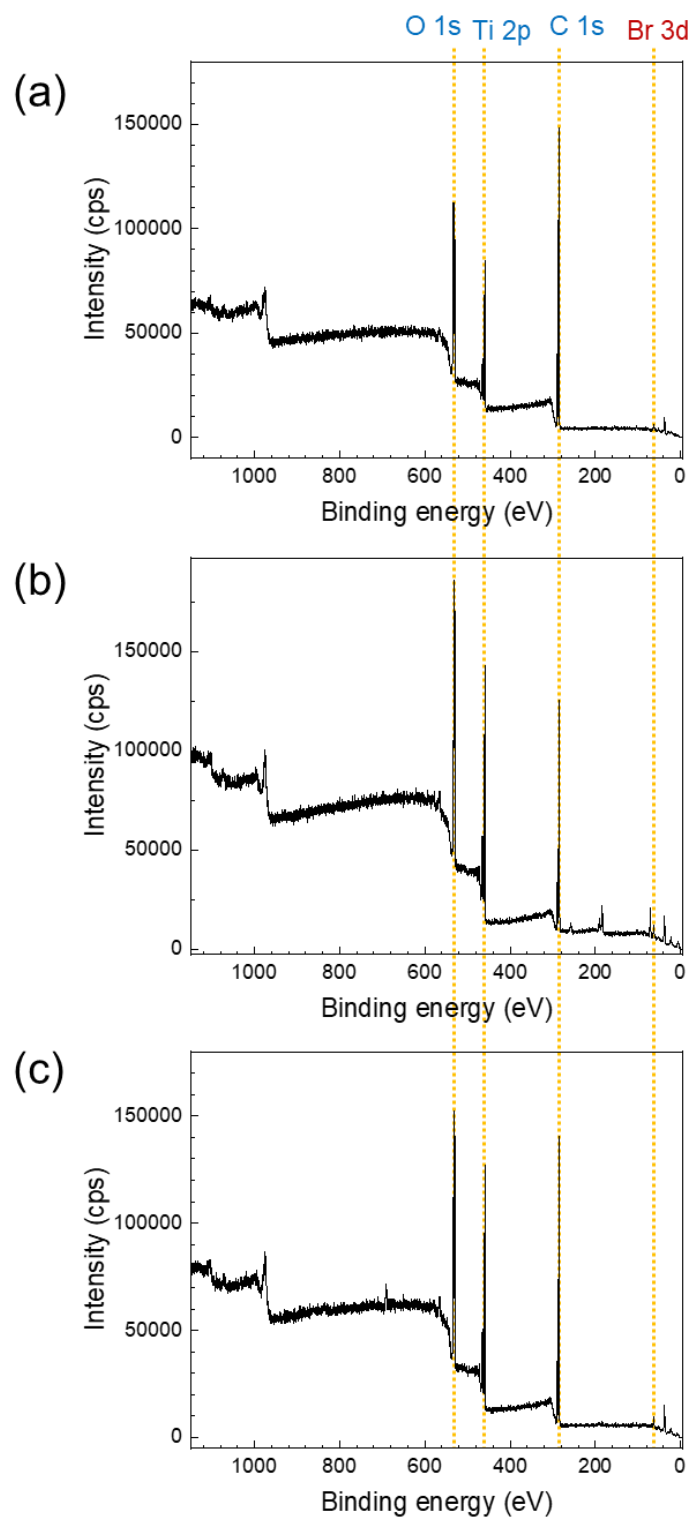

**Fig. S3.** XPS spectra of bare TiO<sub>2</sub> (a), Br<sub>4</sub>Cat-TiO<sub>2</sub> (b), and re-Br<sub>4</sub>Cat-TiO<sub>2</sub> (c). Bare TiO<sub>2</sub> was measured after the same treatment as Br<sub>4</sub>Cat-TiO<sub>2</sub> using acetone instead of an acetone solution of Br<sub>4</sub>Cat.
